# Supplementary material
Source: PubMed Central journal article supplement (PMC3086837)

Supplemental Figure 2

## BACPT Carboxylate Ionization

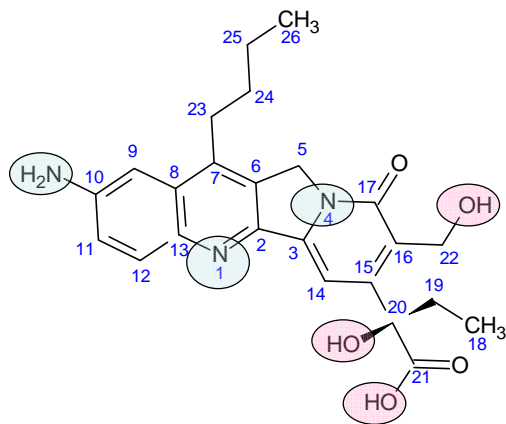

| Dissociated Atom | Apparent pKa |
|------------------|--------------|
| 20-OH            | 15.31        |
| 22-OH            | 13.63        |
| 1-N              | 7.10         |
| 21-OH            | 3.09         |
| 10-N             | 1.51         |
| 4-N              | -3.32        |

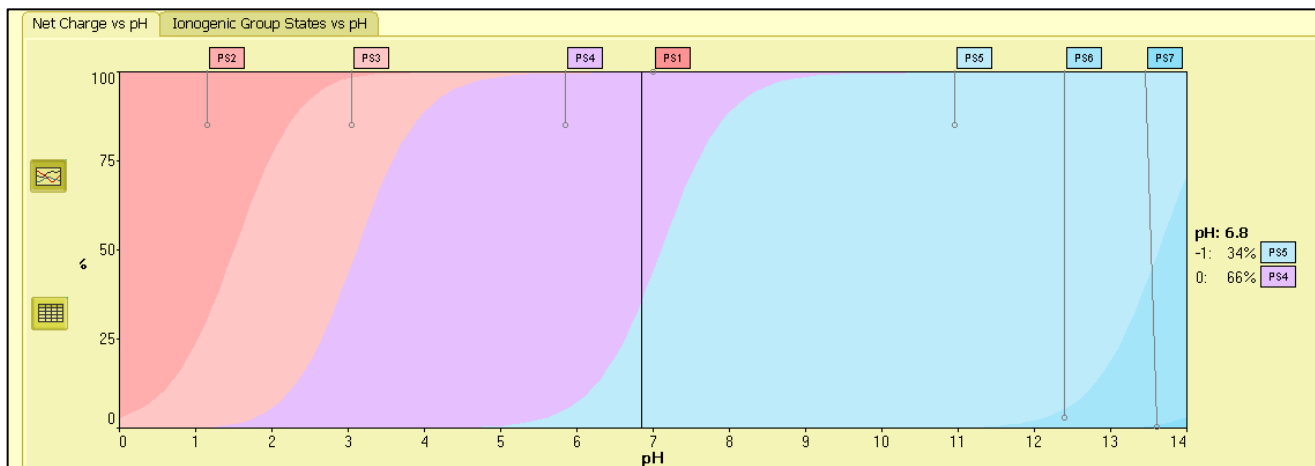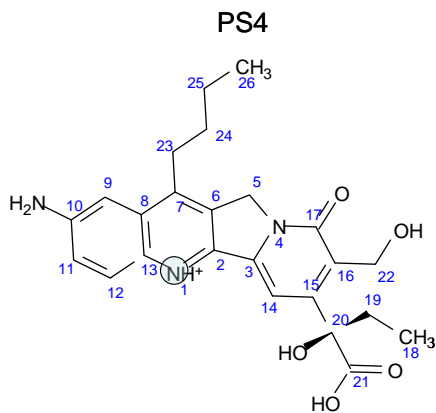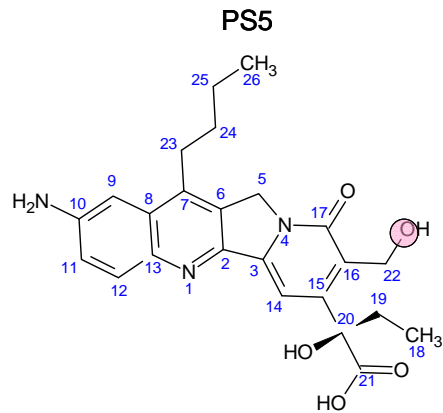

Supplement: NIHMS287052-supplement-Suppl_Fig_2.pdf [file NIHMS287052-supplement-Suppl_Fig_2.pdf]
